# Supplementary material
Source: PubMed Central journal article supplement (PMC3076664)
Supplement: supp_ehq253_ehq253supp.pdf [file supp_ehq253_ehq253supp.pdf]

**Aldehyde Dehydrogenase 2 (ALDH2) Rescues Myocardial**

**Ischemia/Reperfusion Injury: Role of Autophagy Paradox and Toxic Aldehyde**

Heng Ma, Rui Guo, Lu Yu, Yingmei Zhang and Jun Ren

Center for Cardiovascular Research and Alternative Medicine, University of Wyoming,

Laramie, WY 82071, USA

**Table 1: General features of WT, ALDH2 overexpression (ALDH2) and ALDH2 KO mice.**

|                            | <b>WT</b>   | <b>ALDH2</b> | <b>ALDH2 KO</b> |
|----------------------------|-------------|--------------|-----------------|
| Body weight (g)            | 27.5 ± 0.9  | 27.8 ± 1.2   | 27.4 ± 1.1      |
| Heart weight (mg)          | 161 ± 8     | 168 ± 7      | 154 ± 6         |
| Heart/weight (mg/g)        | 5.87 ± 0.24 | 6.07 ± 0.22  | 5.77 ± 0.41     |
| Liver weight (g)           | 1.44 ± 0.07 | 1.43 ± 0.07  | 1.40 ± 0.05     |
| Liver/body weight (mg/g)   | 52.5 ± 2.8  | 52.9 ± 3.9   | 52.4 ± 3.5      |
| Kidney weight (mg)         | 395 ± 13    | 399 ± 20     | 386 ± 23        |
| Kidney/body weight (mg/g)  | 14.5 ± 0.5  | 14.7 ± 1.0   | 14.6 ± 1.4      |
| Wall thickness (mm)        | 0.87±0.06   | 0.85±0.02    | 0.87±0.03       |
| LV diastolic diameter (mm) | 2.90±0.10   | 2.88±0.14    | 2.86±0.08       |
| LV systolic diameter (mm)  | 1.65±0.08   | 1.63±0.11    | 1.66±0.05       |

Supplemental Data (EURHEART J-D-09-03337R1)

|                           |           |           |           |
|---------------------------|-----------|-----------|-----------|
| Normalized LV mass (mg/g) | 2.63±0.30 | 2.69±0.23 | 2.71±0.11 |
| Fractional Shortening (%) | 42.9±1.5  | 45.0±1.9  | 41.9±1.0  |
| Heart Rate (bpm)          | 445±19    | 451±14    | 458±15    |

Mean ± SEM, n = 11-12 mice per group,  $p > 0.05$  in all data presented among the three groups.

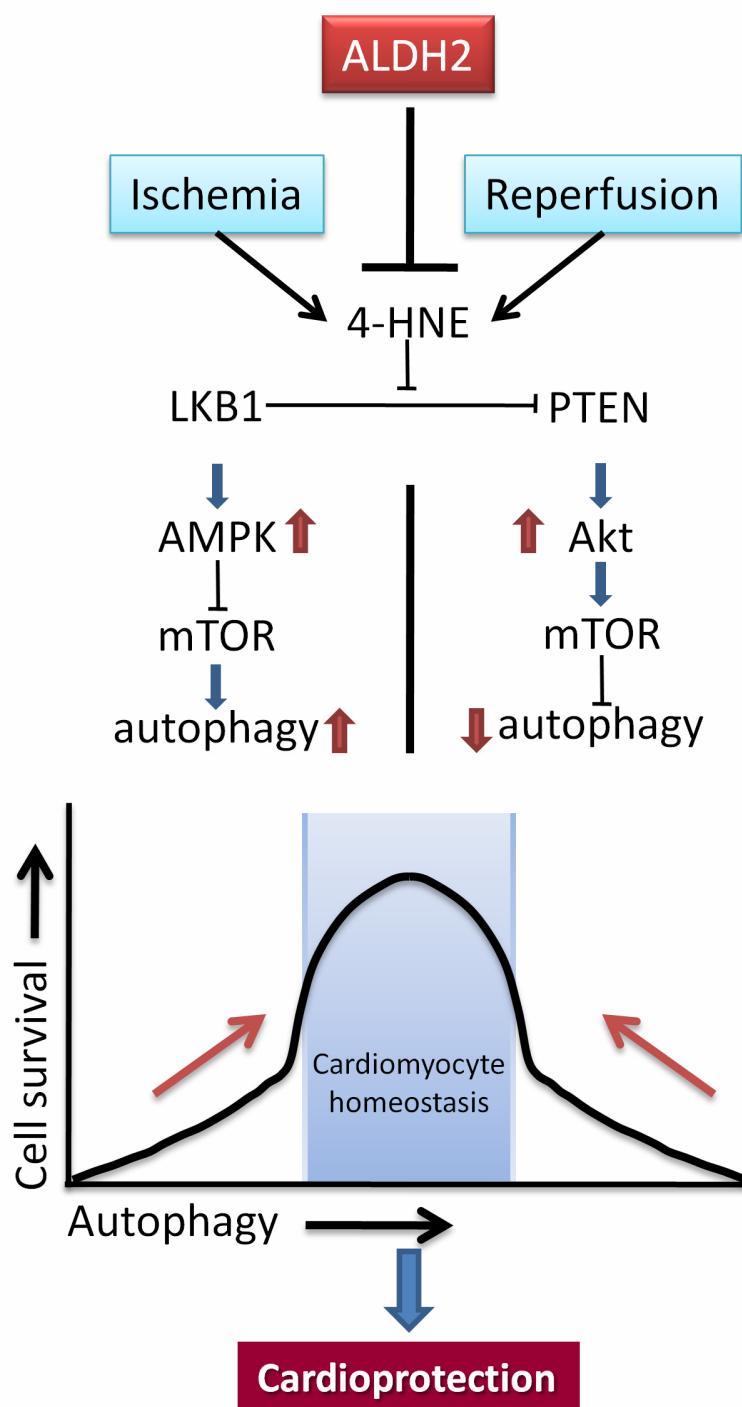

**Supplemental Scheme 1:** ALDH2 decreases cytotoxic aldehyde and modifies autophagy pathway in maintaining survival homeostatic response to ischemia and reperfusion injury.
